1 **A comparison of methodological approaches to the study of young sex chromosomes: A case study in**  
2 ***Poecilia***

3 Iulia Darolti<sup>1</sup>, Pedro Almeida<sup>2</sup>, Alison E. Wright<sup>3</sup>, Judith E. Mank<sup>1,4</sup>

4 1 Department of Zoology and Biodiversity Research Centre, University of British Columbia, Vancouver,  
5 Canada

6 2 Department of Genetics, Evolution and Environment, University College London, London, United  
7 Kingdom

8 3 Ecology and Evolutionary Biology, School of Biosciences, University of Sheffield, Sheffield, United  
9 Kingdom

10 4 Centre for Ecology and Conservation, College of Life and Environmental Sciences, University of Exeter,  
11 Cornwall, United Kingdom

12 Co-corresponding author: Judith E. Mank, e-mail: [mank@zoology.ubc.ca](mailto:mank@zoology.ubc.ca)

13 Co-corresponding author: Iulia Darolti, e-mail: [darolti@zoology.ubc.ca](mailto:darolti@zoology.ubc.ca)

14 **Abstract**

15 Studies of sex chromosome systems at early stages of divergence are key to understanding the initial  
16 process and underlying causes of recombination suppression. However, identifying signatures of  
17 divergence in homomorphic sex chromosomes can be challenging due to high levels of sequence similarity  
18 between the X and the Y. Variations in methodological precision and underlying data can make all the  
19 difference between detecting subtle divergence patterns or missing them entirely. Recent efforts to test  
20 for X-Y sequence differentiation in the guppy have led to contradictory results. Here we apply different  
21 analytical methodologies to the same dataset to test for the accuracy of different approaches in  
22 identifying patterns of sex chromosome divergence in the guppy. Our comparative analysis reveals that  
23 the most substantial source of variation in the results of the different analyses lies in the reference  
24 genome used. Analyses using custom-made *de novo* genome assemblies for the focal species successfully  
25 recover a signal of divergence across different methodological approaches. By contrast, using the distantly  
26 related *Xiphophorus* reference genome results in variable patterns, due to both sequence evolution and  
27 structural variations on the sex chromosomes between the guppy and *Xiphophorus*. Changes in mapping  
28 and filtering parameters can additionally introduce noise and obscure the signal. Our results illustrate how  
29 analytical differences can alter perceived results and we highlight best practices for the study of nascent  
30 sex chromosomes.

## 31 **Introduction**

32 Substantial recent attention in sex chromosome research has focused on the earliest stages of X-Y  
33 divergence in order to glean the initial processes of recombination suppression (Wright et al. 2016).  
34 Studies of nascent sex chromosome divergence will by definition result in subtle patterns of X-Y sequence  
35 differentiation as substantial differences have not yet sufficiently accumulated. Given the expected  
36 subtlety, methodology and underlying data can be quite important, and small changes may make all the  
37 difference between identifying a delicate pattern or missing it entirely.

38 For example, several recent tests for divergence between the guppy X and Y chromosomes have revealed  
39 contradictory results. Full genomic analysis of the *Poecilia reticulata* sex chromosomes was originally  
40 presented in Wright et al. (2017) based on comparisons between male and female genomes (Fig. 1). This  
41 approach can be used to identify what, if any, regions of the Y chromosome are diverged from the X, and  
42 to compare across populations to determine intra-specific variation. Wright et al. (2017) found a relatively  
43 small region (10Mb) of significant Y degeneration, designated Stratum I. This region was characterized by  
44 a reduction in the number of male reads that mapped compared to females, consistent with the concept  
45 of Y degeneration. Moreover, the same pattern was observed in all six of the natural populations assayed  
46 as well as a captive lab population, and the rules of parsimony therefore suggest that Stratum I is ancestral  
47 to the colonization of Trinidad. Wright et al. (2017) also observed evidence of a second region of nascent  
48 divergence, Stratum II, that appeared to have formed independently in three upstream populations, but  
49 was smaller in downstream populations. This region was characterized by an increase in male single  
50 nucleotide polymorphism (SNP) density compared to females but no degradation of the Y. This pattern is  
51 consistent with either greatly reduced or complete loss of male recombination in this region, or selection  
52 against recombinant males.

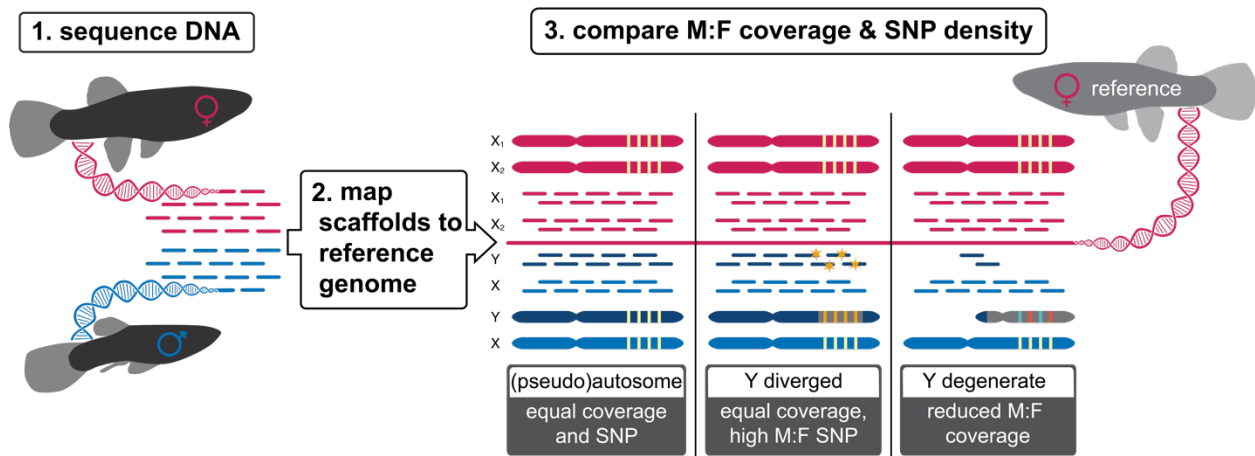

53

54 **Figure 1. Genomic comparisons of male and female DNA data can be used to identify X-Y divergence.**

55 Step (1) Multiple males and females are sequenced, and female reads (red) are assembled, with resulting  
56 scaffolds ordered and oriented to the nearest available full reference genome. Step (2) Male (blue) and  
57 female (red) reads are mapped to this assembly. Step (3) Y divergence leads to male-specific SNPs, and  
58 therefore elevated male:female SNP density. As the Y degenerates, Y reads will no longer map to the X  
59 chromosome assembly, leading to reduced male:female coverage. Method adapted from Vicoso &  
60 Bachtrog 2013 and Vicoso and Bachtrog 2015. Figure courtesy of Jacelyn Shu (jacelyndesigns.com).

61 Almeida et al. (2021) built on these initial findings with a greatly expanded dataset, again recovering  
62 concordant patterns of Stratum I across the same six natural populations of *P. reticulata*. The expanded  
63 dataset incorporated 10X genomics linked-reads, allowing for far more sophisticated analyses. Namely by  
64 phasing X and Y haplotypes, it was possible to discern that Stratum I is comprised of two smaller separate  
65 regions of reduced male:female read depth. This region is also enriched for male-specific sequences, male-  
66 specific SNPs, and repetitive elements, the presence of which necessitate recombination suppression  
67 from the X chromosome. Importantly, there was also evidence of phylogenetic clustering of phased Y  
68 sequence in this region, indicating ancestral recombination suppression. Finally, this replication recovered  
69 evidence of parallel expansion of Stratum II in upstream populations.

70 Expanding phylogenetically, Darolti et al (2019) uncovered consistent patterns of sex chromosome  
71 topology in *P. wingei*. Initial karyotype analysis suggested that the X and Y chromosomes are ancestral to  
72 the common guppy (*P. reticulata*) and Endler's Guppy (*P. wingei*) (Nanda et al. 1993). Furthermore, Darolti  
73 et al. (2019) found the same small region of Y chromosome degeneration consistent with Stratum I,  
74 although somewhat more pronounced in the degree of divergence from the X than *P. reticulata*. The  
75 region of degeneration matched nearly perfectly with *P. reticulata*, suggesting Stratum I was in fact  
76 present in the common ancestor of *P. wingei* and *P. reticulata*. Consistent with this, Morris et al (2018)  
77 found evidence of male-specific sequence shared between *P. reticulata* and *P. wingei*, possible only if  
78 recombination between the X and Y was halted in the common ancestor of these species. Moreover,  
79 Darolti et al. (2020) used SNP segregation patterns from RNA-seq data across pedigrees to determine X  
80 and Y sequence, and found four genes that showed phylogenetic evidence of recombination suppression  
81 in the ancestor of *P. wingei* and *P. reticulata*. Although the bootstrap values for any one locus were not  
82 excessively high, it is telling that all four were in Stratum I. The ancestral origin of Stratum I was further  
83 supported by conserved patterns of male-hypomethylation within this region in both species (Metzger et  
84 al. 2020), consistent with sexualization of gene regulation. Finally, Darolti et al. (2019) found evidence for  
85 another independent origin of Stratum II based on SNP data in *P. wingei*. Work in outgroup species  
86 revealed the same chromosome is a sex chromosome in *P. picta* and *P. parae* (Darolti et al. 2019; Sandkam  
87 et al. 2021), although diverged to a far greater degree in both these species.

88 Crucially, all of these analyses were based on custom genome or transcriptome assemblies generated  
89 bespoke from the underlying data (Wright et al. 2017; Darolti et al. 2019; Darolti et al. 2020; Almeida et  
90 al. 2021), although they did use existing related reference genomes to physically place and orient  
91 scaffolds. This is in contrast to other studies which have used existing resources derived from different  
92 populations or species, resulting in potential mismatches between the underlying data and the genome  
93 to which it is compared. Taking a bespoke approach is critical as it reduces the phylogenetic distance  
94 between the sequence reads and the reference to which they are mapped, which can increase the  
95 proportion of reads that are accurately mapped and reduce issues arising from structural variation and  
96 repetitive sequence. Secondly, an important step in identifying diverged regions in sex chromosomes is  
97 ensuring stringent mapping parameters (Carvalho and Clark 2013; Smeds et al. 2015; Vicoso and  
98 Bachtrog 2013; Vicoso and Bachtrog 2015; Palmer et al. 2019). This is particularly relevant for  
99 homomorphic sex chromosomes as they still retain sequence orthology between the X and Y, and  
100 incorrectly mapped reads can mask coverage differences between the sexes and lead to the  
101 misclassification of sex-linked sequences as autosomal. Wright et al. (2017), Darolti et al. (2019) and  
102 Almeida et al. (2021) used stringent mapping limits, removed minor alleles with low frequency, which  
103 likely represent sequencing errors, and focused on coding sequence to minimize issues with repetitive  
104 elements (Table 1). This was based on the reasoning that young sex chromosomes would exhibit subtle  
105 divergence signatures, and stringency would be required to detect it (Palmer et al. 2019; Vicoso and  
106 Bachtrog 2015).

107

**Table 1. A comparison of methods and findings for *P. reticulata* sex chromosome strata**

| Study                      | Evidence for Stratum I from M:F read depth | Phylogenetic clustering of Y sequences in Stratum I | Evidence for Stratum II from M:F $F_{ST}$ | Genome Assembly                                        | Read depth analysis                                                           | SNP analysis                                                                        |
|----------------------------|--------------------------------------------|-----------------------------------------------------|-------------------------------------------|--------------------------------------------------------|-------------------------------------------------------------------------------|-------------------------------------------------------------------------------------|
| Wright et al. (2017)       | Yes                                        | n/a                                                 | Yes                                       | Bespoke ( <i>P. reticulata</i> )                       | Uniquely mapping reads                                                        | Limited to coding sequence; Site coverage > 10; SNP frequency > 0.3 x site coverage |
| Bergero et al. (2019)      | No                                         | n/a                                                 | Yes                                       | Kunstner et al. (2016) ( <i>P. reticulata</i> )        | Default mismatch parameters, duplicate reads excluded                         | Quality score > 30; Minimum coverage 20; Biallelic SNPs                             |
| Darolti et al. (2019)      | Yes                                        | n/a                                                 | Yes                                       | Bespoke ( <i>P. reticulata</i> and <i>P. wingei</i> )  | Uniquely mapping read                                                         | Limited to coding sequence; Site coverage > 10; SNP frequency > 0.3 x site coverage |
| Charlesworth et al. (2020) | No                                         | n/a                                                 | Yes                                       | Kunstner et al. (2016) ( <i>P. reticulata</i> )        | Not reported*                                                                 | Not reported*                                                                       |
| Fraser et al. (2020)       | Yes                                        | n/a                                                 | No                                        | Bespoke ( <i>P. reticulata</i> )                       | Default mismatch parameters                                                   | MAF > 0.05                                                                          |
| Kirkpatrick et al. (2020)  | No                                         | Yes                                                 | No                                        | Schartl et al. (2013) ( <i>Xiphophorus maculatus</i> ) | Default read mapping parameters with local argument, duplicate reads excluded | Quality score > 20; Minimum read depth 3; Biallelic SNPs                            |
| Almeida et al. (2021)      | Yes                                        | Yes                                                 | Yes                                       | Bespoke ( <i>P. reticulata</i> , river-specific)       | Uniquely mapping reads, duplicate reads excluded                              | MAF > 0.1; excluding extremely high coverage sites                                  |

\*Mapping criteria not reported in methods and bioinformatic code not publicly available. Defaults assumed. MAF = minor allele frequency.

108

109 Despite observing remarkable concordance of these patterns across multiple datasets, species and  
 110 analytical methods, other recent studies have differed substantially in their approach and reported some  
 111 different results (Table 1). For example, Bergero et al. (2019) did not report evidence for Stratum I in their  
 112 own *P. reticulata* data, and although they did uncover a pattern that is broadly consistent with Stratum II,  
 113 it was not statistically different across populations (Charlesworth et al. 2020). Fraser et al. (2020)  
 114 identified small male-specific regions largely consistent with the regions identified by Almeida et al.  
 115 (2021), although because of scaffold orientation differences and population-specific inversions, they are

116 in different physical locations. Finally, Kirkpatrick et al. (2020), reanalyzing data from Darolti et al. (2019)  
117 found evidence of Stratum I and Stratum II in *P. wingei*, but not in *P. reticulata*. Notably, they did find  
118 phylogenetic evidence of recombination suppression in the ancestor of these two species in Stratum I,  
119 consistent with Darolti et al. (2020) and Almeida et al. (2021).

120 Importantly Bergero et al. (2019), Charlesworth et al. (2020) and Kirkpatrick et al. (2020) relied on existing  
121 reference genomes for all their analyses and did not use genomic reads to build custom-made assemblies  
122 for the target species. Importantly, Kirkpatrick et al. (2020) mapped reads from *P. wingei* and *P. reticulata*  
123 to *Xiphophorus*, which last shared a common ancestor 40 mya (Kumar et al. 2017). Additionally, Bergero  
124 et al. (2019) used less stringent mapping criteria, and Charlesworth et al. (2020) and Fraser et al. (2020)  
125 used default mapping parameters. Together, this produces two sources of potential methodological noise  
126 in replication efforts. First, noise can arise from accumulated mutations due to phylogenetic distance  
127 between the samples used to generate sequence reads and the genome that they are mapped to. Second,  
128 permissive default mapping parameters allow for mismapping, and therefore potentially result in  
129 significant noise in genomic comparisons between males and females. In addition to this, many of these  
130 studies used different underlying datasets that varied in sample origin, number and read depth, and so it  
131 is difficult to distinguish the role of sample variation from methodological differences in these  
132 discrepancies.

133 The proliferation of studies on this system with different levels of analytical sophistication allow for a  
134 remarkable comparison of the role of genomic methodology in pattern discovery. We tested various  
135 methods on the same underlying data with the goal of determining the methodological reasons for  
136 inconsistent findings across these studies, and to develop best practices moving forward to the genomic  
137 study of nascent sex chromosome systems.

## 138 **Methods**

### 139 *Datasets*

140 Using the *P. reticulata* data from Almeida et al. (2021) and the *P. wingei* data from Darolti et al. (2019),  
141 we ran multiple analyses of guppy sex chromosome evolution, following the various analytical methods  
142 used by Wright et al. (2017), Bergero et al. (2019) and Kirkpatrick et al. (2020), as summarized in Table 1  
143 and detailed below. We were unable to include the methodology of Charlesworth et al. (2020) as mapping  
144 criteria was not reported in methods and bioinformatic code is not publicly available. The datasets for *P.*  
145 *reticulata* and *P. wingei* included paired-end DNA-seq reads from three males and three females from the

146 Quare upstream population (EBI ENA under BioProject PRJEB39998) and from our lab population (NCBI  
147 SRA under BioProject PRJNA528814), respectively. We assessed read quality using FastQC v0.11.9  
148 ([www.bioinformatics.babraham.ac.uk/projects/fastqc/](http://www.bioinformatics.babraham.ac.uk/projects/fastqc/), last accessed 8 November 2021), trimmed using  
149 Trimmomatic v0.36 (Bolger et al. 2014) and concatenated reads as in Darolti et al. (2019) and Almeida et  
150 al. (2021). To replicate previous studies, all analyses were repeated using several different genomes and  
151 their respective gene annotations, which included the *P. reticulata* Quare *de novo* genome assembly from  
152 Almeida et al. (2021), the *P. reticulata* reference genome from Kunstner et al. (2016) (NCBI accession  
153 GCF\_000633615.1), the *P. wingei* *de novo* genome assembly from Darolti et al. (2019) and the *Xiphophorus*  
154 *maculatus* reference genome from Scharl et al. (2013) (NCBI accession GCF\_002775205.2, v5.0).

### 155 *Coverage analysis*

156 For each focal species, we used three separate methodological pipelines to map and filter reads and to  
157 estimate read depth. The first method followed the analysis in Wright et al. (2017), which used bwa  
158 v0.7.15 aln/sampe (Li and Durbin 2009) to map reads, removed reads that were not uniquely mapping  
159 and estimated coverage with soap.coverage v2.7.7 (<http://soap.genomics.org.cn>, last accessed 1 April  
160 2019). The second method followed the pipeline in Kirkpatrick et al. (2020), which mapped reads using  
161 bowtie2 v2.2.9 with default parameters and the -local argument (Langmead and Salzberg 2012), removed  
162 PCR duplicates using Picard v2.0.1 (<http://broadinstitute.github.io/picard>, last accessed 8 November  
163 2021) and calculated coverage with BEDtools v2.26 (Quinlan and Hall 2010). Lastly, the third method  
164 followed the analysis in Bergero et al. (2019), which mapped reads with bwa mem and the -M argument  
165 (Li and Durbin 2009), removed PCR duplicates with BEDtools (Quinlan and Hall 2010) and estimated  
166 coverage using SAMtools v1.3.1 (Li et al. 2009).

167 For all three methodological pipelines, average coverage values were calculated separately for males and  
168 females, and average male:female coverage for each non-overlapping window was calculated as  
169  $\log_2(\text{average male coverage}) - \log_2(\text{average female coverage})$ . A window size of 50kb was used for all *P.*  
170 *reticulata* analyses and *P. wingei* analyses based on the *X. maculatus* genome, while 10kb windows were  
171 used for *P. wingei* analyses using the more fragmented *de novo P. wingei* genome. Moving averages of  
172 coverage were plotted in R v4.0.5 (R Core Team 2019) based on sliding window analyses using the  
173 *roll\_mean* function. Ninety-five percent confidence intervals for the moving average plots were obtained  
174 by randomly sampling autosomal values 1,000 times without replacement.

### 175 *SNP density analysis*



176 To further assess patterns of Y divergence, for both *P. reticulata* and *P. wingei*, we compared three  
177 methodological approaches of estimating SNP density differences between males and females.

178 First, based on Wright et al. (2017), we mapped reads to each genome using bowtie2 with default  
179 parameters (Langmead and Salzberg 2012). After file sorting, we used bow2pro v0.1  
180 (<http://guanine.evolbio.mpg.de>, last accessed 8 November 2021) to generate a profile for each sample,  
181 representing counts for each of the four nucleotide bases at each site. We then applied a minimum site  
182 coverage threshold of 10 and kept SNPs with a frequency of 0.3 times the site coverage. We further used  
183 gene annotation information to remove SNPs from the analysis if they were not located within coding  
184 sequences. For each sample, we calculated average SNP density for each gene as the sum of all SNPs  
185 divided by the sum of filtered sites in that gene, excluding those with zero filtered sites.

186 Second, following Kirkpatrick et al. (2020), we called variants from files previously filtered for PCR  
187 duplicates (see *Coverage analysis* section above) using BCFtools v.1.3.1 (Li 2011). We then filtered variants  
188 using VCFtools v0.1.12b (Danecek et al. 2011), removing indels and variants with a quality score lower  
189 than 20, and selecting for biallelic SNPs and a minimum read depth of 3. For each sample, we then used  
190 BEDtools counts to count the number of SNPs within 50kb windows across the genome.

191 Third, we used the pipeline in Bergero et al. (2019) to call SNPs from the PCR duplicates filtered files (see  
192 *Coverage analysis* section above) using GATK HaplotypeCaller v4.1.9 (Poplin et al. 2017) with the  
193 parameters --emit-ref-confidence GVCF and -stand-call-conf 30. Further genotyping was done with GATK  
194 GenotypeGVCFs with default parameters and SelectVariants to keep SNPs with a minimum coverage of  
195 20, minimum quality of 30 and selecting for biallelic SNPs only. For each sample, we then used BEDtools  
196 counts to count the number of SNPs within 50kb windows across the genome.

197 Lastly, in each of these three methodological approaches, average SNP density across all males and across  
198 all females was calculated separately. For each gene or window, we calculated male:female SNP density  
199 as  $\log_2(\text{average male SNP density}) - \log_2(\text{average female SNP density})$ . We then divided male:female SNP  
200 density estimates into autosomal and sex-linked based on chromosomal position. The distributions of  
201 male:female SNP density for the autosomes and the sex chromosomes were plotted in R (R Core Team  
202 2019) and differences between them were tested using Wilcoxon rank sum tests.

203 *Pairwise synteny analyses*

204 We used LAST v1256 (Kielbasa et al. 2011) to perform pairwise synteny analyses between the *P. reticulata*  
205 sex chromosome (chromosome 12) from the reference genome (Kunstner et al. 2016), the *P. reticulata*  
206 sex chromosome from the Quare de novo assembly (Almeida et al. 2021) and the *X. maculatus* syntenic  
207 chromosome 8. For alignments involving the *X. maculatus* sequence, we used LAST with the HOXD70  
208 seeding scheme designed for a higher rate of substitution, whereas for alignments involving *P. reticulata*  
209 sequences only we used the uNEAR seeding scheme for aligning sequences with lower rate of  
210 substitutions.

## 211 **Results**

212 Using the same dataset across different genomes and methods, we first assessed the role of various  
213 genomic analysis parameters (Table 1) in detecting Stratum I on the *P. reticulata* and *P. wingei* sex  
214 chromosomes, previously reported in Wright et al. (2017), Darolti et al. (2019) and Almeida et al. (2021),  
215 summarized in Fig. 2 and Fig. 3.

216 Analyses on *P. reticulata* sequencing data that used the custom-made *de novo P. reticulata* genome  
217 assembly show a significantly lower male to female coverage, indicative of X-Y degeneration, at the distal  
218 end of the chromosome, in the previously estimated location of Stratum I (Fig. 2A, B). This pattern is  
219 evident from both the analysis that followed the pipeline from Wright et al. (2017) (Fig. 2A) and the  
220 analysis based on the methodology in Kirkpatrick et al. (2020) (Fig. 2B). All three analyses that relied on  
221 the *X. maculatus* reference genome also show a region with decreased male coverage relative to that in  
222 females, however, this region is shifted closer to the end of the chromosome and only partially overlaps  
223 with the syntenic region of the estimated location of *P. reticulata* Stratum I (Fig. 2D, E, F). Pairwise  
224 alignments revealed several structural rearrangements between the *P. reticulata* sex chromosome  
225 (chromosome 12) and the syntenic *X. maculatus* chromosome 8, particularly in the region of the predicted  
226 guppy Stratum I (Fig. 4), which may explain the shifted position of the region with low male coverage in  
227 analyses that use the *X. maculatus* genome. In addition, different methodological parameters can have a  
228 significant impact on the proportion of reads mapped. Mapping efficiency is substantially reduced when  
229 using the *X. maculatus* reference (Table 2), which decreases power to detect a signal of X-Y differentiation.

230 We find no clear pattern of Stratum I when mapping reads to the *P. reticulata* reference genome based  
231 on the methodology in Bergero et al. (2019) (Fig. 2C). While we cannot disentangle between the reference  
232 genome used and the methodology in this analysis, our other data suggests that the absence of a Stratum  
233 I signal is largely due to the *P. reticulata* reference genome. Specifically, when mapping *P. reticulata* reads

234 to the *X. maculatus* genome we recover qualitatively the same coverage pattern across all three  
 235 methodological approaches (Fig. 2D, E, F). Similarly, our *P. wingei* analyses detailed below reveal that,  
 236 when using the same genome, the Bergero et al. (2019) pipeline produces very similar patterns to the  
 237 other two methodological approaches (Fig. 3). Previous work has reported several inversions and  
 238 assembly errors on the sex chromosome of the first draft of the *P. reticulata* reference genome (Bergero  
 239 et al. 2019; Darolti et al. 2020; Charlesworth et al. 2020; Fraser et al. 2020), which may be obscuring a  
 240 signal of Stratum I.

## Method

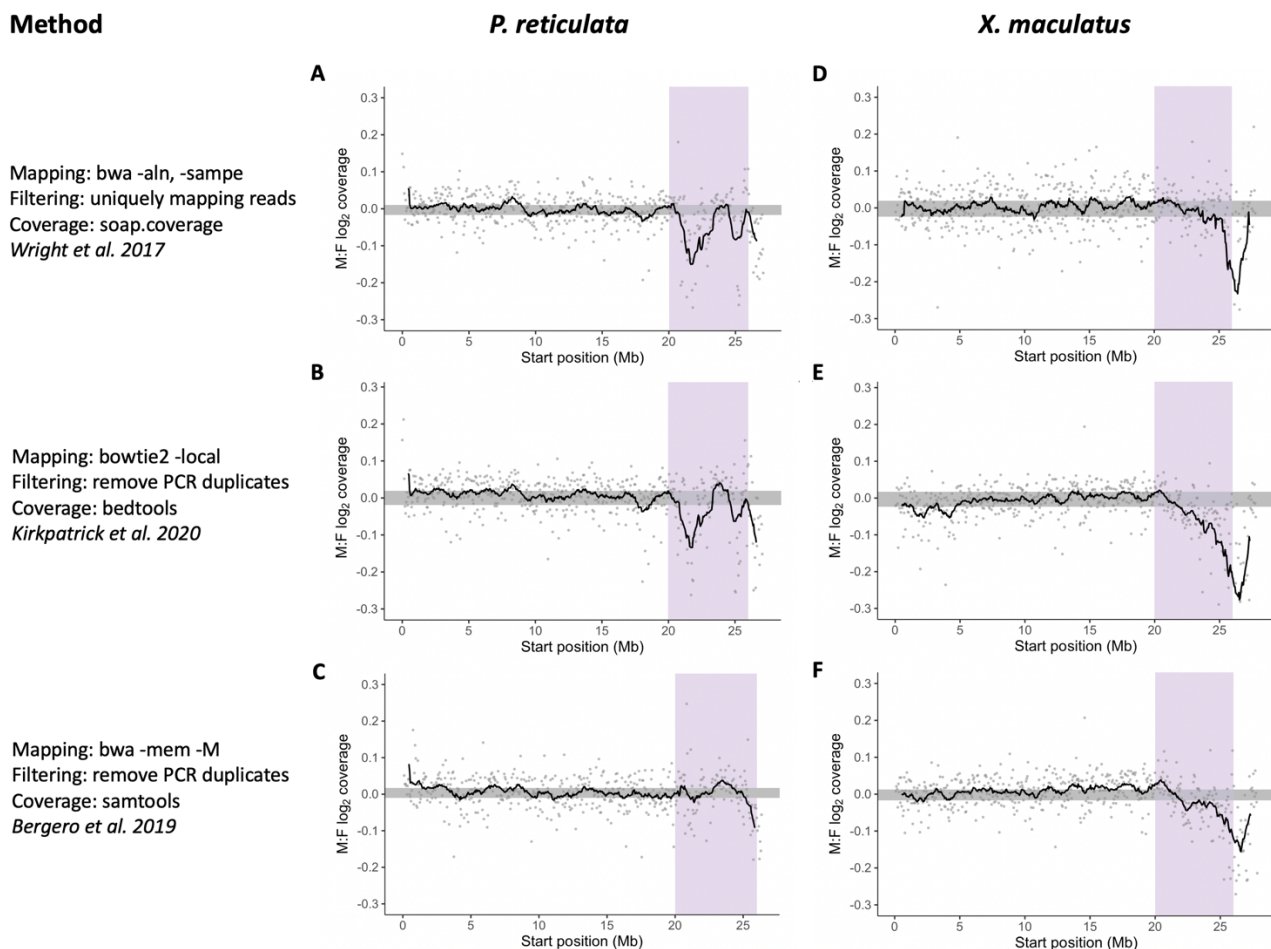

241

242 **Figure 2. Signal for *P. reticulata* Stratum I using comparative methodological approaches.** *P. reticulata* DNA-seq  
 243 reads were mapped in turn to a *P. reticulata* genome assembly and the *X. maculatus* reference genome assembly  
 244 (Schartl et al. 2013). For replicating previous studies, the *P. reticulata* reference genome from Kunstner et al. (2016)  
 245 was used in the analysis based on the methods from Bergero et al. (2019), while the high quality Quare *de novo*  
 246 assembly from Almeida et al. (2021) was used in the other two analyses. Moving average plots represent male to  
 247 female coverage differences across the guppy sex chromosome (*P. reticulata* chromosome 12, and syntenic *X.*  
 248 *maculatus* chromosome 8) in non-overlapping windows of 50kb. 95% confidence intervals, based on bootstrapping  
 249 autosomal values, are shown in grey, and predicted boundaries for Stratum I from Almeida et al. (2021) are  
 250 highlighted in purple.

251 The analyses for *P. wingei* also reveal a lower male to female coverage at the distal end of the  
252 chromosome, however, this pattern is only observed in analyses that mapped reads to the *de novo P.*  
253 *wingei* assembly (Fig. 3A, B, C). By contrast, the analyses that used the *X. maculatus* genome all show a  
254 significantly elevated read depth in males compared to females, similar to the results in Kirkpatrick et al.  
255 (2020) (Fig. 3D, E, F). Previous cytogenetic work has shown that the *P. wingei* Y chromosome is the largest  
256 chromosome in the genome, having accumulated a large heterochromatin block (Nanda et al. 2014).  
257 However, in addition to the expansion of repetitive sequence, duplication events from the rest of the  
258 genome could have also contributed to the remarkable size of the *P. wingei* Y chromosome. Duplications  
259 from the X chromosome to the Y chromosome would explain a signal of elevated coverage in males  
260 relative to females in this species.

## Method

Mapping: `bwa -aln, -sampe`  
Filtering: uniquely mapping reads  
Coverage: `soap.coverage`  
*Wright et al. 2017*

Mapping: `bowtie2 -local`  
Filtering: remove PCR duplicates  
Coverage: `bedtools`  
*Kirkpatrick et al. 2020*

Mapping: `bwa -mem -M`  
Filtering: remove PCR duplicates  
Coverage: `samtools`  
*Bergero et al. 2019*

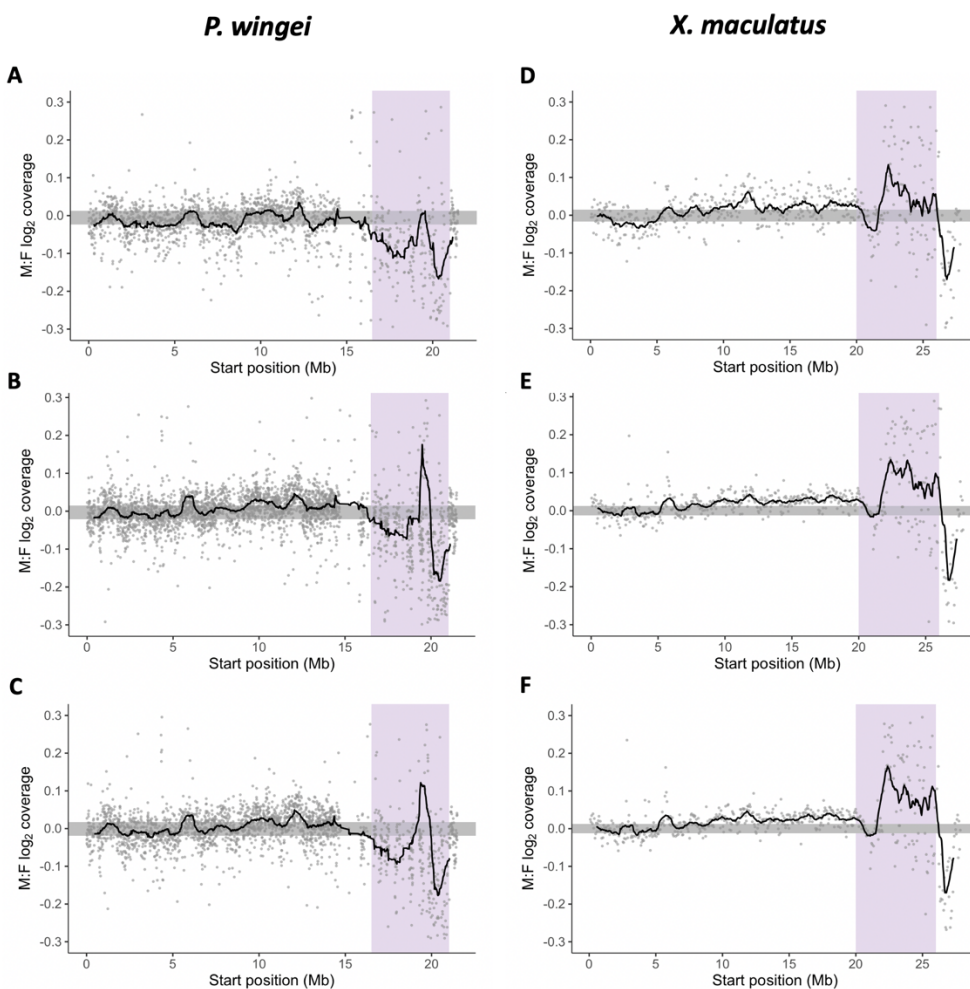

261

262 **Figure 3. Signal for *P. wingei* Stratum I using comparative methodological approaches.** *P. wingei* DNA-seq reads  
263 were mapped in turn to a *de novo P. wingei* genome assembly (Darolti et al. 2019) and the *X. maculatus* reference  
264 genome assembly (Schartl et al. 2013). Moving average plots represent male to female coverage differences across  
265 the sex chromosome (*P. wingei* chromosome 12, and syntenic *X. maculatus* chromosome 8) in non-overlapping

266 windows of 50kb for the analyses that rely on the *X. maculatus* genome and windows of 10kb for the analyses that  
267 use the *de novo* *P. wingei* genome. The 95% confidence intervals, based on bootstrapping autosomal values, are  
268 shown in grey, and predicted boundaries for Stratum I from Darolti et al. (2019) are highlighted in purple.

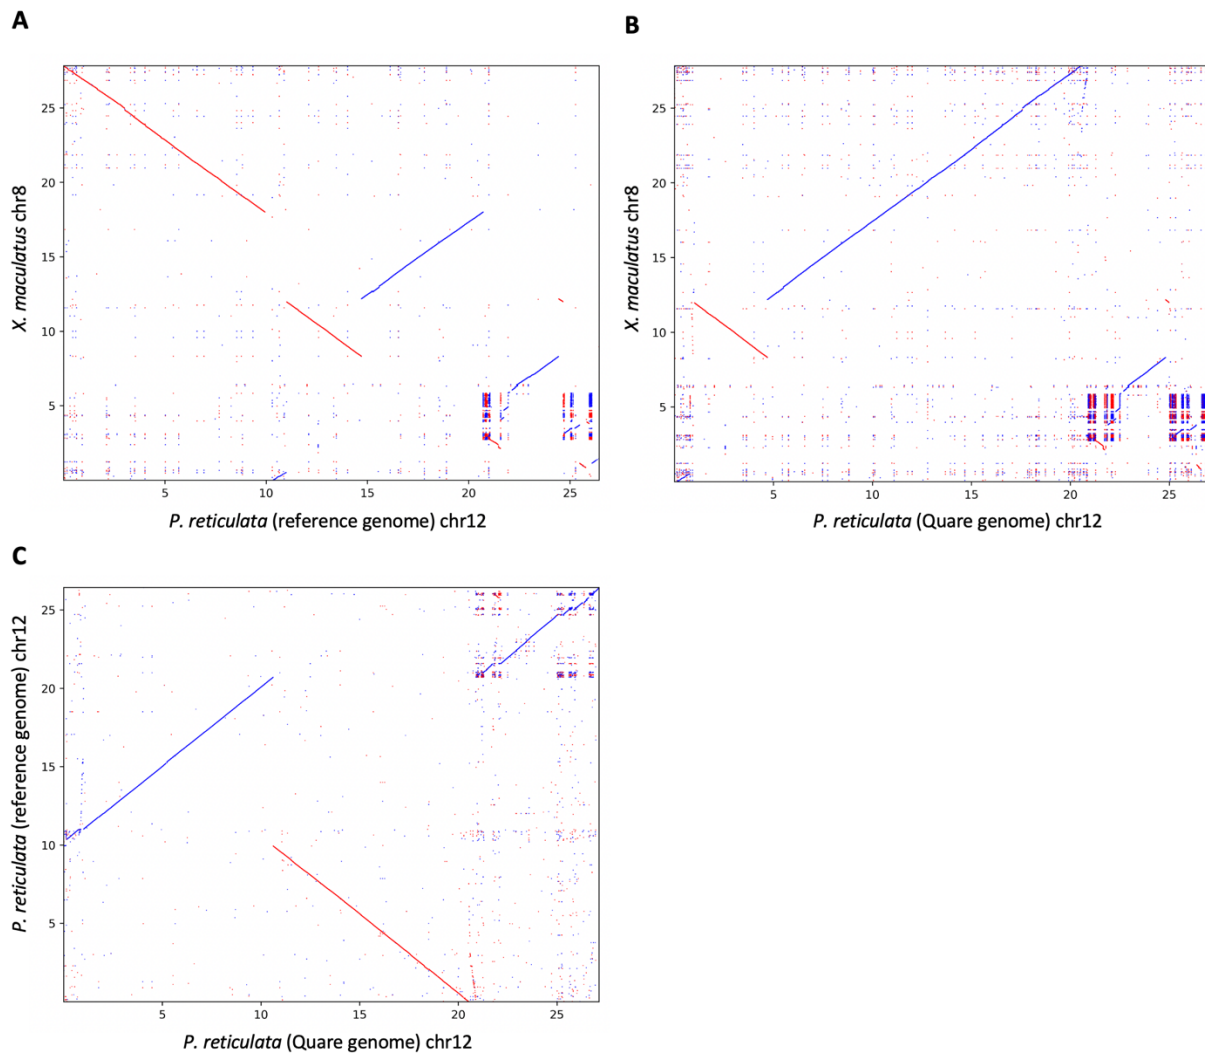

269

270 **Figure 4. Structural rearrangements and duplications between *P. reticulata* and *X. maculatus* genomes.** Dot-plots  
271 of alignments between (A) *X. maculatus* chromosome 8 and *P. reticulata* chromosome 12 from the reference  
272 genome assembly (Kunstner et al. 2016), (B) *X. maculatus* chromosome 8 and *P. reticulata* chromosome 12 from the  
273 Quare *de novo* genome assembly (Almeida et al. 2021), and (C) *P. reticulata* chromosome 12 from the reference  
274 genome assembly and chromosome 12 from the Quare *de novo* genome assembly. Forward alignments are shown  
275 in blue and reverse alignments in red.

276

**Table 2. Percentage of concordant, properly paired\* read alignments**

| Data   | Sequencing data                                  | <i>P. reticulata</i> |                     | <i>P. wingei</i> |                     |
|--------|--------------------------------------------------|----------------------|---------------------|------------------|---------------------|
|        | Genome assembly                                  | <i>P. reticulata</i> | <i>X. maculatus</i> | <i>P. wingei</i> | <i>X. maculatus</i> |
| Method | bwa -aln/-sampe<br><i>Wright et al. 2017</i>     | 59                   | 5                   | 75               | 17                  |
|        | bowtie2 -local<br><i>Kirkpatrick et al. 2020</i> | 83                   | 56                  | 87               | 71                  |
|        | bwa -mem -M<br><i>Bergero et al. 2019</i>        | 83                   | 72                  | 84               | 79                  |

\*Both mates of a read pair map to the same chromosome or scaffold, with the expected insert size and read orientation.

277

278 Regions of the sex chromosomes where recombination has recently been halted or greatly suppressed  
279 still retain a high degree of similarity between X and Y sequences. They are also expected to show an  
280 elevated SNP density in males compared to females, as Y-linked reads carrying Y-specific polymorphisms  
281 will still align to the homologous X region of the female reference genome (Fig. 1; Vicoso et al. 2013). We  
282 observed this pattern in *P. wingei* (Darolti et al. 2019) and in replicate upstream populations of *P.*  
283 *reticulata* (Wright et al. 2017; Almeida et al. 2020), and we designated this as Stratum II. It is important to  
284 note that in contrast to Stratum I, Stratum II appears to have formed independently several times.  
285 Therefore, to further quantify divergence between the sex chromosomes we investigated SNP density  
286 differences between the sexes using several methodological approaches. In *P. reticulata*, we observe a  
287 significantly elevated male SNP density on the sex chromosomes in both of the analyses that aligned reads  
288 to the *de novo P. reticulata* genome (Wilcoxon rank sum test  $p < 0.001$ , Fig. 5A, B). By contrast, the SNP  
289 density profiles of the autosomes and the sex chromosomes were indistinguishable in all the analyses that  
290 used *X. maculatus* as the reference genome (Fig. 5D, E, F), due to the accumulation of numerous fixed  
291 differences between *P. reticulata* and *X. maculatus* which conceal the subtle polymorphisms differences  
292 between *P. reticulata* males and females. The *P. wingei* X and Y chromosomes have previously been  
293 suggested to be more diverged than those of *P. reticulata*, as shown through more pronounced coverage  
294 and SNP density differences between the sexes (Darolti et al. 2019) and a greater accumulation of  
295 repetitive sequences on the sex chromosomes in *P. wingei* compared to *P. reticulata* (Morris et al. 2018;  
296 Almeida et al. 2021). Our results here confirm this, as we find a significantly higher male:female SNP  
297 density for the sex chromosomes compared to the autosomes across all methodological analyses, as well  
298 as when using either one of the *P. wingei de novo* or the *X. maculatus* genomes (Wilcoxon rank sum test  
299  $p < 0.001$ , Fig. 6).

## Method

SNP calling: bow2pro  
Filtering: min. coverage 10, MAF > 0.3  
SNP density: per gene  
*Wright et al. 2017*

SNP calling: bcftools  
Filtering: QUAL 20, min. read depth 3  
SNP density: per 50kb windows  
*Kirkpatrick et al. 2020*

SNP calling: GATK  
Filtering: QUAL 30, min. read depth 20  
SNP density: per 50kb windows  
*Bergero et al. 2019*

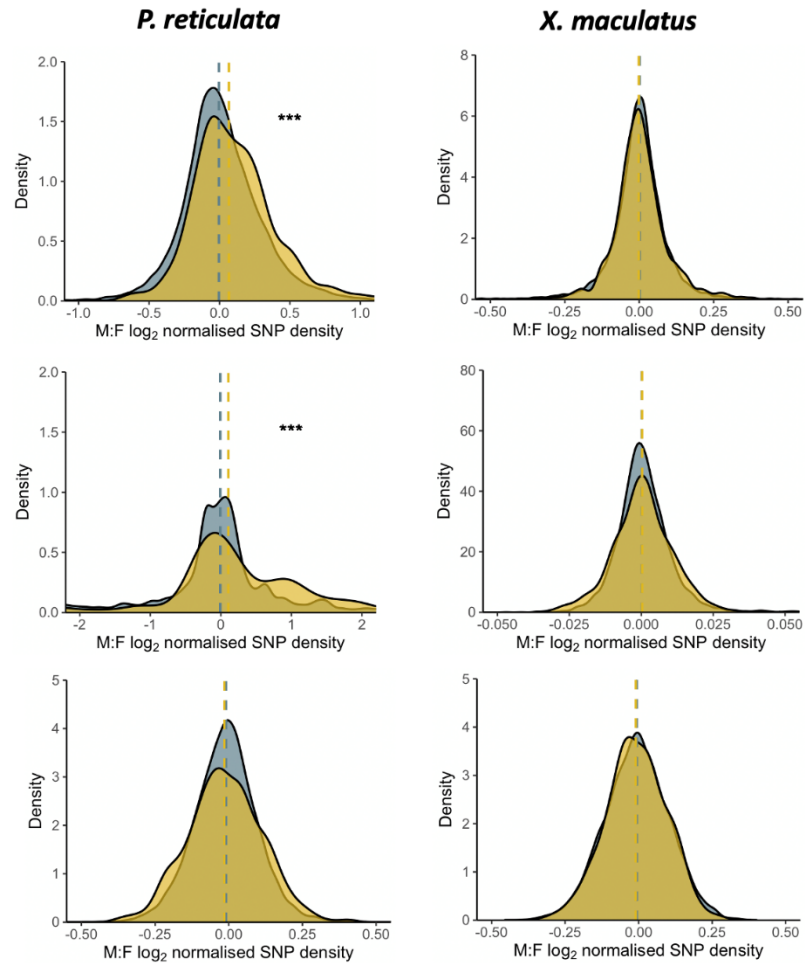

300

301 **Figure 5. Distribution of *P. reticulata* male:female SNP density for the autosomes (gray) and the sex**  
302 **chromosomes (yellow).** Dashed vertical lines indicate median SNP densities and significant differences between  
303 the autosomes and the sex chromosomes are shown (\*\*\*)  $p$ -value < 0.001).

## Method

SNP calling: bow2pro  
 Filtering: min. coverage 10, MAF > 0.3  
 SNP density: per gene  
*Wright et al. 2017*

SNP calling: bcftools  
 Filtering: QUAL 20, min. read depth 3  
 SNP density: per 50kb windows  
*Kirkpatrick et al. 2020*

SNP calling: GATK  
 Filtering: QUAL 30, min. read depth 20  
 SNP density: per 50kb windows  
*Bergero et al. 2019*

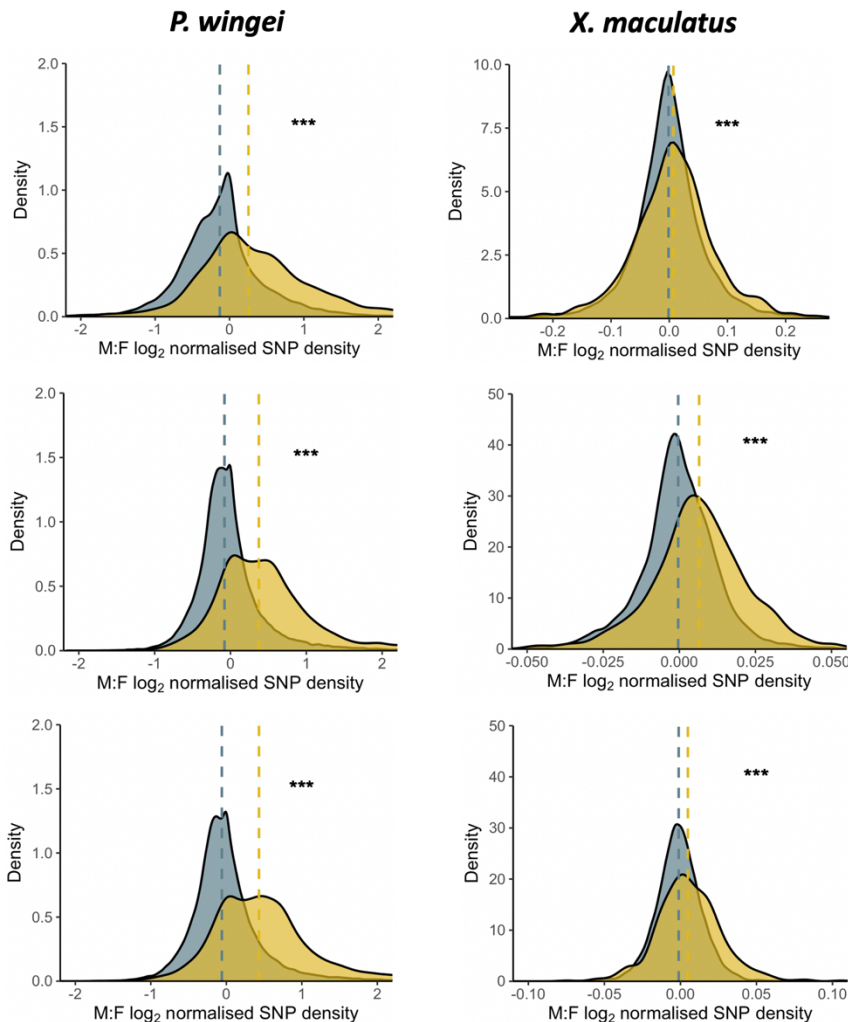

304

305 **Figure 6. Distribution of *P. wingei* male:female SNP density for the autosomes (gray) and the sex chromosomes**  
 306 **(yellow).** Dashed vertical lines indicate median SNP densities and significant differences between the autosomes  
 307 and the sex chromosomes are shown (\*\*\*)  $p$ -value < 0.001.

308

## 309 Discussion

310 Replication is fundamental to scientific pursuits, and confirmation is necessary to build a robust  
 311 understanding of the natural world. The expansion of public data efforts has greatly aided transparency  
 312 and replication efforts, and this remarkable and rapid shift in the scientific culture is exemplified by  
 313 genomics research, where most of the major journals require deposition of sequencing data as a condition  
 314 of publication. Failures to replicate results are concerning, and necessitate further work to validate or  
 315 nullify. However, it is important to understand that different replication approaches will have different  
 316 risks of Type II errors, or erroneous negative results. This is especially problematic for the detection of  
 317 subtle, small effect patterns, such as with initial divergence between X and Y chromosomes.



318 Here we used the same dataset across various methodologies and genome assemblies to test the  
 319 sensitivity and accuracy of different approaches. Our results show how small changes in the precision of  
 320 methods can lead to the failure to detect patterns of sex chromosome differentiation in the guppy. The  
 321 low overall divergence between the X and Y can make detection difficult, but it has nonetheless been  
 322 observed across multiple datasets, spanning DNA, RNA and methylation data, as well as multiple methods,  
 323 including comparisons of male and female coverage and SNP density (Wright et al. 2017; Darolti et al.  
 324 2019; Almeida et al. 2021), identification of male-specific sequence (Morris et al. 2018; Almeida et al.  
 325 2021), phylogenetic analysis of recombination suppression (Darolti et al. 2020; Almeida 2021), and  
 326 comparative epigenomics (Metzger et al. 2020) (Fig. 7).

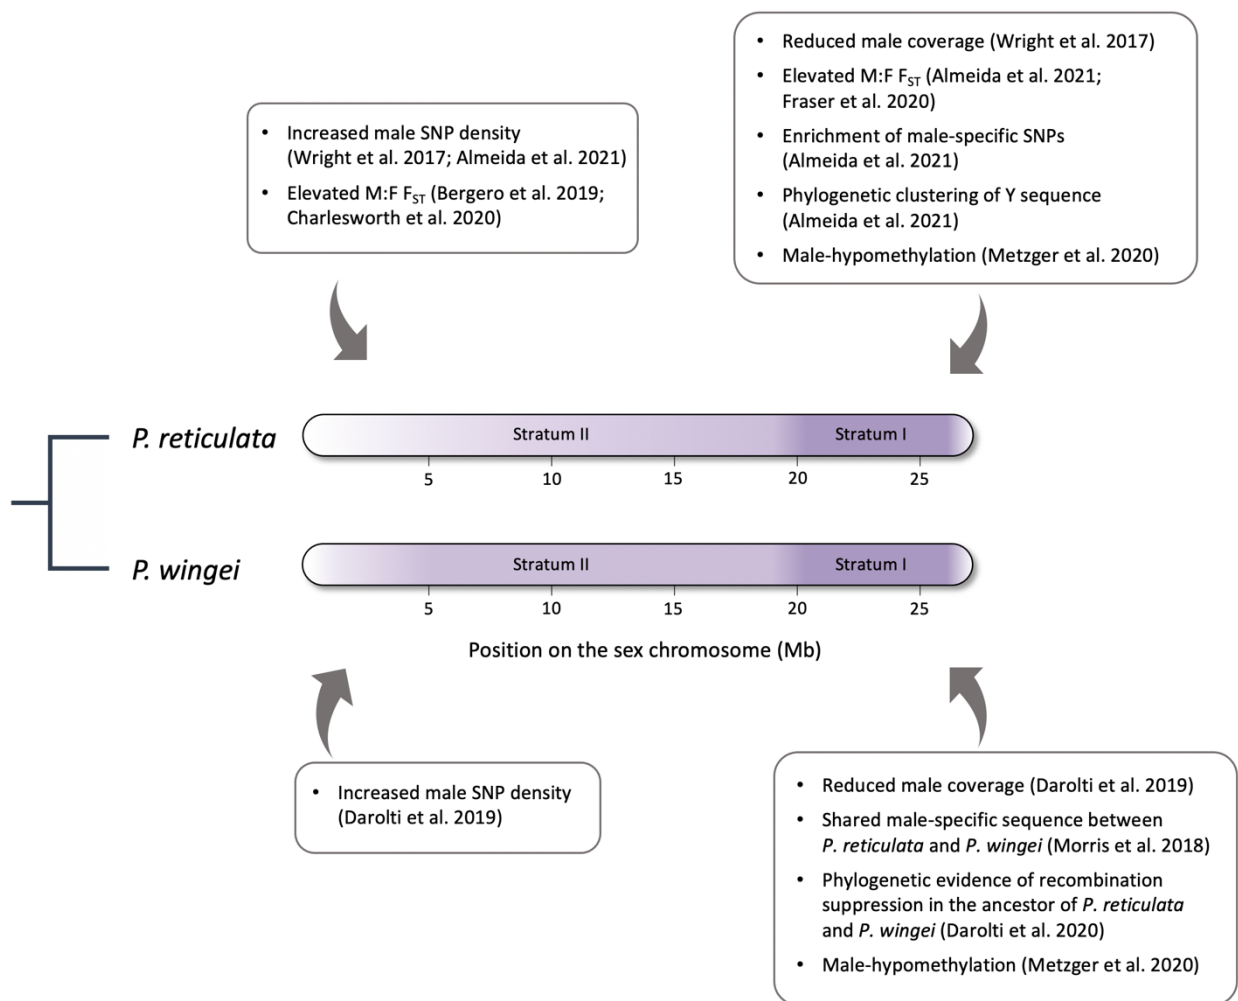

327

328 **Figure 7. Structure of the *P. reticulata* and *P. wingei* sex chromosomes as predicted by multiple methods, including**  
 329 **comparisons of male and female coverage, SNP density, phylogenetic and methylation analyses.**

330 By using the same sample data across multiple methods and genomes, our results illustrate how  
331 important methodological differences can alter perceived results, and highlight the need for replication  
332 studies to at minimum replicate the analysis using identical methods on the original or equivalent dataset.  
333 When possible, replication efforts should go beyond minimum, and expand the analysis by employing  
334 more sophisticated methods on existing or expanded datasets. Despite this, some replication efforts use  
335 less sophisticated approaches, and in these cases, there is a real concern that a perceived failure of  
336 replication is instead the result of a lack of precision or statistical power. This is particularly problematic  
337 in the field of genomics, as there is little consensus about the gold standard in methodologies, particularly  
338 with regard to data processing and filtering procedures. The lack of standardized practices, coupled with  
339 the rich nature of genomic data and the complexity of genomes can make it difficult to discern subtle but  
340 important patterns.

341 Our approach of evaluating the same underlying data with multiple methods and genomes does not  
342 account for natural variation across samples and populations, which is substantial (Wright et al. 2017;  
343 Almeida et al. 2021). For our *P. reticulata* samples, we chose individuals from an upstream low predation  
344 Quare population which we have previously shown to have an intermediate signal of sex chromosome  
345 divergence (Wright et al. 2017; Almeida et al. 2021). Samples from populations with greater or lesser  
346 signal, or sampling variation due to differences in inversions, duplications and divergence among  
347 individuals may also contribute to observed differences.

#### 348 ***Stratum I***

349 We have previously observed evidence for a small region of ancestral recombination suppression in *P.*  
350 *wingei* and *P. reticulata* (Wright et al. 2017; Darolti et al. 2019; Almeida et al. 2021). This has been  
351 replicated in some studies, for example Fraser et al. (2020) also found evidence of small regions of Y  
352 divergence, and Kirkpatrick et al. (2020) confirmed the phylogenetic clustering of Y sequence in this  
353 stratum. However, other studies (Bergero et al. 2019; Charlesworth et al. 2020; Kirkpatrick et al. 2021) did  
354 not fully replicate these findings.

355 It is worth noting that Stratum I region of the guppy Y chromosome is enriched for repetitive elements  
356 (Almeida et al. 2021), and reads from this region may, depending on the parameters used, map to  
357 repetitive elements across the genome, obscuring real read depth differences between males and females  
358 if non-coding sequence is included in the analysis. Focusing on uniquely mapping reads when comparing  
359 coverage differences between males and females can minimize issues associated with Y repetitive regions.

360 However, our comparative analysis revealed that a pattern of X-Y differentiation can still be recovered  
361 without restricting the analysis to uniquely mapping reads (Fig. 2, Fig. 3). More stringent SNP filtering  
362 parameters can also help eliminate noise in genomic comparisons, and this is particularly important when  
363 studying young sex chromosomes as they are expected to exhibit subtle divergence signatures. We were,  
364 however, able to identify a signal of elevated male SNP density on the sex chromosomes relative to the  
365 autosomes, indicative of Y divergence, across several methodological approaches using different degrees  
366 of filtering stringency (Fig. 5, Fig. 6).

367 Beyond mapping parameters, by far the most substantial source of variation in the results of the different  
368 pipelines we compared lies in the reference genome used. This is in part due to the extensive structural  
369 variation across populations and species (Fig. 4), but also due to sequence evolution. These two factors  
370 combined mean that error compounds over phylogenetic distances, and as the distance between the  
371 samples and the genome they are mapped to increases, the ability to detect reduced male:female read  
372 depth decreases. This is most evidenced in the strategy by Kirkpatrick et al. (2020), who mapped reads  
373 from *Poecilia* species to the *Xiphophorus* genome. They argued that changes over the 40 my phylogenetic  
374 distance separating these genera was outweighed by the fact that the *Xiphophorus* genome is more  
375 complete. However, the read mapping rate in Table 2 reveals instead that this strategy is less accurate  
376 than using less-complete species- or population-specific genome assemblies, as a significantly smaller  
377 proportion of *Poecilia* reads map to the *Xiphophorus* genome across all methods, thereby reducing usable  
378 data. This problem is exacerbated by the substantial structural differences between *Xiphophorus* and  
379 *Poecilia* on the sex chromosome (Fig. 4), further complicating the comparison. Interestingly, their mapping  
380 and filtering methods would have detected Stratum I if they had mapped to a con-specific genome (Fig.  
381 2B, Fig. 3B). To a lesser extent, this is also a problem when mapping data to genomes assembled on  
382 different *P. reticulata* populations. The genome used can also greatly affect the perceived patterns of SNP  
383 diversity, and relying on the distantly related *Xiphophorus* genome can obscure a signal of elevated male  
384 SNP density on the sex chromosomes due to fixed differences between the target species reads and the  
385 *Xiphophorus* sequence (Fig. 5).

## 386 **Stratum II**

387 As recombination is increasingly suppressed in nascent regions of a sex chromosome, we expect the  
388 accumulation of Y-specific SNPs, and we observed this in replicate upstream populations of *P. reticulata*  
389 (Wright et al 2019; Almeida et al. 2021) and in *P. wingei* (Darolti et al. 2019), consistent with convergent  
390 evolution across populations and species (Darolti et al. 2020). Whether this is due to the important

391 environmental effects on recombination rate (Plough 1917; Grell 1971; Stevison et al. 2019), sexual  
392 conflict (Wright et al. 2017), neutral shifts in male recombination hotspots (Wright et al 2016; Bergero et  
393 al. 2019) or selection against recombinants in the wild remains an important area of further work.

394 Additionally, given that many mechanisms of recombination suppression only accumulate over time  
395 (Furman et al. 2020 and references cited), it also remains unclear how complete recombination  
396 suppression is in this region, and whether rare recombination events observed in this region in lab-reared  
397 males (Bergero et al. 2019) occur in wild populations. Regardless, it is important to note that suppressed  
398 recombination does not necessarily mean that recombination never occurs between the X and Y  
399 chromosomes, but rather that it is at least exceedingly rare or recombinant individuals are selected  
400 against.

401 Because of the expected heterogeneity observed in the initial stages of the divergence process (Bergero  
402 et al. 2013; Natri et al. 2013; Reichwald et al 2015), sliding window approaches may be insufficient to  
403 reveal overall patterns of elevated male SNP density expected in these regions. Density distributions or  
404 direct statistical comparisons between species may be required. This is evidenced by our observation of  
405 elevated male:female SNP density across nearly all methods (Fig. 5 and 6), with the exception of *P.*  
406 *reticulata* data mapped to the *Xiphophorus* genome, again illustrating the problems with mapping over  
407 vast evolutionary distances.

408

#### 409 **Concluding remarks**

410 Here we have used the same data to compare methods and genomes in the discovery of nascent sex  
411 chromosomes. We hope that our results provide a gold standard for future work in other study systems,  
412 and resolve some of the recent controversy over the sex chromosomes in *Poecilia*.

413

#### 414 **Acknowledgements**

415 We thank Jacelyn Shu of jacelyndesigns.com for drafting Fig. 1. We gratefully acknowledge funding from  
416 the ERC (grant agreement 680951), NSERC and a Canada 150 Research Chair to JEM.

417

#### 418 **References**

419 Almeida, P., Sandkam, B.A., Morris, J., Darolti, I., Breden, F., Mank, J.E. (2021) Divergence and  
420 remarkable diversity of the Y chromosome in guppies. *Molecular Biology & Evolution* 38, 619-633

- 421 Bergero, R., Qui, S., Forrest, A., Borthwick, H., Charlesworth D. (2013) Expansions of the pseudo-  
422 autosomal region and ongoing recombination suppression in the *Silene latifolia* sex chromosomes.  
423 *Genetics* 194, 673-686
- 424 Bergero, R., Gardner, J., Bader, B., Yong, L., Charlesworth, D. (2019) Exaggerated heterochiasmy in a fish  
425 with sex-linked male coloration polymorphisms. *Proceedings of the National Academy of Sciences USA*  
426 116, 6924-6931
- 427 Bolger, A. M., Lohse, M., & Usadel, B. (2014). Trimmomatic: a flexible trimmer for Illumina sequence  
428 data. *Bioinformatics*, 30, 2114-2120.
- 429 Carvalho, A.B., Clark, A.G. (2013). Efficient identification of Y chromosome sequences in the human and  
430 *Drosophila* genomes. *Genome Research* 23, 1894–1907
- 431 Charlesworth, D., Bergero, R., Graham, C., Gardner, J., Yong, L. 2020. Locating the sex determining  
432 region of linkage group 12 of guppy (*Poecilia reticulata*). *G3* 10, 3639-3649
- 433 Darolti, I., Wright, A.E., Mank, J.E. (2020) Guppy Y chromosome integrity maintained by incomplete  
434 recombination suppression. *Genome Biology & Evolution* 12, 965-977
- 435 Darolti, I., Wright, A.E., Sandkam, B.A., Morris, J., Bloch, N.I., Farré, M., Fuller, R.C., Bourne, G.R. Larkin,  
436 D.M., Breden, F., Mank, J.E. (2019) Extreme heterogeneity in sex chromosome differentiation and dosage  
437 compensation in livebearers. *Proceedings of the National Academy of Sciences, USA* 116, 19031-19036
- 438 Danecek, P., Auton, A., Abecasis, G., Albers, C. A., Banks, E., DePristo, M. A., Handsaker, R. E., Lunter, G.,  
439 Marth, G. T., Sherry, S. T., McVean, G., Durbin, R., 1000 Genomes Project Analysis Group. (2011). The  
440 variant call format and VCFtools. *Bioinformatics* 27, 2156-2158
- 441 Fraser, B.A., Whiting, J.R., Paris, J.R., Weadick, C.J., Parsons, P.J., Charlesworth, D., Bergero, R., Bemm, F.,  
442 Hoffmann, M., Kottler, V.A., Liu, C., Dreyer, C., Weigel, D. (2020) Improved reference genome uncovers  
443 novel sex-linked regions in the guppy (*Poecilia reticulata*). *Genome Biology & Evolution* 12, 1789–1805
- 444 Furman, B.L.S., Metzger, D.C.H., Darolti, I., Wright, A.E., Sandkam, B.A., Almeida, P., Shu, J.J., Mank, J.E.  
445 (2020) Sex chromosome evolution: So many exceptions to the rules. *Genome Biology & Evolution* 12,  
446 750-763
- 447 Grell, R.F., 1971. Heat induced exchange in fourth chromosome of diploid females of *Drosophila*  
448 *melanogaster*. *Genetics* 69, 523-527
- 449 Kiełbasa, S. M., Wan, R., Sato, K., Horton, P., & Frith, M. C. (2011). Adaptive seeds tame genomic  
450 sequence comparison. *Genome research* 21, 487-493
- 451 Kirkpatrick, M., Dixon, G., Sardell, J.M., Schartl, M., Peichel, C.L. (2020). Evolution of the canonical sex  
452 chromosomes of the guppy and relatives. *Biorxiv* doi: <https://doi.org/10.1101/2020.09.25.314112>
- 453 Kumar, S., Stecher, G., Suleski, M., Hedges, S.B. (2017) TimeTree: A Resource for Timelines, Timetrees,  
454 and Divergence Times. *Molecular Biology and Evolution* 34, 1812–1819
- 455 Kunstner, A., Hoffmann, M., Fraser, B.A., Kottler, V.A., Sharma, E., Weigel, D., Dreyer, C. (2016) The  
456 genome of the Trinidadian guppy, *Poecilia reticulata*, and variation in the Guanapo population. *PLOS*  
457 *ONE* 11, e0169087
- 458 Langmead, B., Salzberg, S. L. (2012). Fast gapped-read alignment with Bowtie 2. *Nature methods* 9, 357-  
459 359

- 460 Li, H. (2011). A statistical framework for SNP calling, mutation discovery, association mapping and  
461 population genetical parameter estimation from sequencing data. *Bioinformatics*, 27, 2987-2993
- 462 Li, H., Durbin, R. (2009) Fast and accurate short read alignment with Burrows-Wheeler  
463 transform. *Bioinformatics* 25, 1754–1760
- 464 Li, H., Handsaker, B., Wysoker, A., Fennell, T., Ruan, J., Homer, N., Marth, G., Abecasis, G., Durbin, R.,  
465 1000 Genome Project Data Processing Subgroup (2009). The sequence alignment/map format and  
466 SAMtools. *Bioinformatics* 25, 2078-2079
- 467 McKenna, A., Hanna, M., Banks, E., Sivachenko, A., Cibulskis, K., Kernytsky, A., Garimella, K., Altshuler,  
468 D., Gabriel, S., Daly, M., DePristo, M. A. (2010). The Genome Analysis Toolkit: a MapReduce framework  
469 for analyzing next-generation DNA sequencing data. *Genome research* 20, 1297-1303
- 470 Metzger, D.C.H., Mank, J.E. (2020) Conserved sex-biased DNA methylation patterns target key  
471 developmental genes and non-recombining region of the guppy sex chromosome. *Biorxiv* doi:  
472 <https://doi.org/10.1101/2020.08.21.261792>
- 473 Morris, J., Darolti, I., Bloch, N.I., Wright, A.E., Mank, J.E. (2018). Shared and species-specific patterns of  
474 nascent Y chromosome evolution in two guppy species. *Genes* 9, 238
- 475 Nanda, I., Schartl, M., Epplen, J.T., Feichtinger, W., Schmid, M (1993) Primitive sex chromosomes in  
476 poeciliid fishes harbour simple repetitive DNA sequences. *Journal of Experimental Biology* 265, 301-  
477 308
- 478 Natri, H.M., Shikano, T., Merila, J. (2013) Progressive recombination suppression and  
479 differentiation in recently evolved neo-sex chromosomes. *Molecular Biology & Evolution* 30, 1131-  
480 1144
- 481 Palmer, D.H., Rogers, T.F., Dean, R., Wright, A.E. (2019) How to identify sex chromosomes and their  
482 turnover. *Molecular Ecology*. 28, 4709– 4724
- 483 Plough, H.H. 1917. The effect of temperature on crossing over in *Drosophila*. *Journal of Experimental*  
484 *Zoology* 24, 147–209
- 485 Postlethwait, J.H., Warren, W.C. (2013) The genome of the platyfish, *Xiphophorus maculatus*, provides  
486 insights into evolutionary adaptation and several complex traits. *Nature Genetics* 45, 567-572
- 487 Quinlan, A. R., & Hall, I. M. (2010). BEDTools: a flexible suite of utilities for comparing genomic  
488 features. *Bioinformatics* 26, 841-842
- 489 R Core Team (2019) R: A language and environment for statistical computing. R Foundation for  
490 Statistical Computing, Vienna.
- 491 Reichwald, K., et al. (2015) Insights into sex chromosome evolution and agene from the genome of a  
492 short-lived fish. *Cell* 163, 1527-1538
- 493 Sandkam, B.A., Almeida, P., Darolti, I., Furman, B.L.S., van der Bijl W., Morris, J., Bourne, G.R., Breden, F.,  
494 Mank, J.E. (2021) Extreme Y chromosome polymorphism corresponds to five male reproductive morphs  
495 in a freshwater fish. *Nature Ecology & Evolution* 5, 939-948
- 496 Schartl, M., Walter, R.B., Shen, Y.J., Garcia, T., Catchen, J., Amores, A., Braasch, I., Chalopin, D., Volf, J.,  
497 J.N., Lesch, K.P., Bisazza, A., Minx, P., Hillier, L., Wilson, R.K., Fuerstenberg, S., Boore, J., Searle, S.,

- 498 Postlethwait, J.H., Warren, W.C. (2013). The genome of the platyfish, *Xiphophorus maculatus*, provides  
499 insights into evolutionary adaptation and several complex traits. *Nature genetics* 45, 567-572
- 500 Smeds, L., Warmuth, V., Bolivar, P., Uebbing, S., Burri, R., Suh, A., Ellegren, H. (2015). Evolutionary  
501 analysis of the female-specific avian W chromosome. *Nature Communications* 6,7330
- 502 Stevison, L.S., Sefich, S., Chase, R., Graze, R.M. (2017). Recombination rate plasticity: revealing  
503 mechanisms by design. *Philosophical Transactions of the Linnean Society, B.* 372, 20160459
- 504 Vicoso, B., Bachtrog, D. (2015). Numerous transitions of sex chromosomes in Diptera. *PLOS Biology*, 13,  
505 e1002078
- 506 Vicoso, B., Bachtrog, D. (2013). Reversal of an ancient sex chromosome to an autosome in *Drosophila*.  
507 *Nature*, 499, 332–335
- 508 Vicoso, B., Emerson, J. J., Zektser, Y., Mahajan, S., & Bachtrog, D. (2013). Comparative sex chromosome  
509 genomics in snakes: differentiation, evolutionary strata, and lack of global dosage compensation. *PLoS*  
510 *biology*, 11, e1001643
- 511 Wright, A.E., Dean, R., Zimmer, F., Mank, J.E. (2016) How to make a sex chromosome. *Nature*  
512 *Communications* 7, 12087
- 513 Wright, A.E., Darolti, I., Bloch, N.I., Oostra, V., Sandkam, B., Buechel, S.D., Kolm, N., Breden, F., Vicoso,  
514 B., Mank, J.E. (2017) Convergent recombination suppression suggests a role of sexual selection in guppy  
515 sex chromosome formation. *Nature Communications* 8: 14251
